# Supplementary material
Source: PubMed Central journal article supplement (PMC6869333)
Supplement: NIHMS1059461-supplement-Supplemental_Table_1.pdf [file NIHMS1059461-supplement-Supplemental_Table_1.pdf]

**Supplementary Table 1. Number and percentage of monocyte subsets and plasma viral load over time.**

| Animal ID                                             | CM07           |       |                 | DB79           |       |       | FD05           |       |                 | FB92             |       |                 |
|-------------------------------------------------------|----------------|-------|-----------------|----------------|-------|-------|----------------|-------|-----------------|------------------|-------|-----------------|
| CNS pathology <sup>a</sup>                            | SIVE           |       |                 | SIVE           |       |       | SIVE           |       |                 | SIVnoE           |       |                 |
| Timepoint (dpi) <sup>b</sup>                          | 0              | 26    | 75              | 0              | 26    | 91    | 0              | 26    | 95              | 0                | 26    | 118             |
| Viral Load (x10 <sup>6</sup> , Copy Eq./mL)           | U <sup>c</sup> | 24.0  | 7.4             | U <sup>c</sup> | 23.0  | 11.0  | U <sup>c</sup> | 48.0  | 58.0            | U <sup>c</sup>   | 21.0  | NA <sup>d</sup> |
| <b>Monocyte Count (Cells/μL)</b>                      |                |       |                 |                |       |       |                |       |                 |                  |       |                 |
| CD14++CD16-                                           | 204            | 265   | 188             | 246            | 443   | 508   | 116            | 334   | 222             | 217              | 285   | 400             |
| CD14++CD16+                                           | 28             | 93    | 13              | 21             | 91    | 271   | 9              | 119   | 99              | 14               | 44    | 28              |
| CD14+CD16++                                           | 13             | 26    | 6               | 24             | 76    | 289   | 2              | 22    | 17              | 6                | 11    | 4               |
| <b>Percent of Total Monocytes</b>                     |                |       |                 |                |       |       |                |       |                 |                  |       |                 |
| CD14++CD16-                                           | 83.5%          | 69.0% | 90.5%           | 84.5%          | 72.6% | 47.5% | 91.3%          | 70.3% | 65.7%           | 91.6%            | 83.8% | 92.6%           |
| CD14++CD16+                                           | 11.2%          | 24.3% | 6.4%            | 7.1%           | 14.9% | 25.4% | 7.1%           | 25.1% | 29.3%           | 5.9%             | 12.9% | 6.5%            |
| CD14+CD16++                                           | 5.2%           | 6.7%  | 3.1%            | 8.4%           | 12.5% | 27.1% | 1.6%           | 4.6%  | 5.0%            | 2.5%             | 3.2%  | 0.9%            |
| <b>Cells per sample (x10<sup>3</sup>)<sup>e</sup></b> |                |       |                 |                |       |       |                |       |                 |                  |       |                 |
| CD14++CD16-                                           | 130            | 1000  | 24              | 100            | 65    | 190   | 62             | 46    | NA <sup>d</sup> | 50               | 38    | 57              |
| CD14++CD16+                                           | 36             | 110   | 18              | 10             | 54    | 100   | 14             | 100   | NA <sup>d</sup> | 4                | 60    | 24              |
| CD14+CD16++                                           | 11             | 15    | 10 <sup>f</sup> | 13             | 35    | 100   | 1 <sup>f</sup> | 10    | NA <sup>d</sup> | 1.8 <sup>f</sup> | 15    | 16              |

a. SIVE: SIV encephalitis, SIVnoE: SIV no encephalitis.

b. dpi: days post infection.

c. U: undetectable (< 100 copy equivalents/mL).

d. NA: sample not available.

e. Total number of FACS-sorted monocytes collected from each subset.

f. Sample failed quality control and was excluded from analysis
