# Supplementary material
Source: PubMed Central journal article supplement (PMC6869333)
Supplement: NIHMS1059461-supplement-Supplemental_Tables_2-7.pdf [file NIHMS1059461-supplement-Supplemental_Tables_2-7.pdf]

**Supplementary Table 2. Sequence of oligonucleotides used for qRT-PCR**

| <b>Target</b>      | <b>Sequence (5' – 3')</b>   |
|--------------------|-----------------------------|
| <b>CD14</b>        |                             |
| Forward            | CCGAGATGTATGTGGTCCAG        |
| Reverse            | GATCGAGCACTCTGAGCTTG        |
| Probe <sup>a</sup> | AGCGCCCTAAACTCCCTCAATCTGT   |
| <b>CD16</b>        |                             |
| Forward            | GCTCCGGATATCTTTGGTGA        |
| Reverse            | AGCACCTGTACCATTGAGG         |
| Probe <sup>a</sup> | TTTCAGCTGGCATGCGGACTGAAGAT  |
| <b>S100A9</b>      |                             |
| Forward            | GGACACAAATGCAGACAAGC        |
| Reverse            | AGACCTGGCTTATGGTGGTG        |
| Probe <sup>a</sup> | AGTTCATCATGCTGATGGCGAGGCTA  |
| <b>CCR2</b>        |                             |
| Forward            | CTTCTTCATCATCCTCCTGA        |
| Reverse            | GAATCTTCTTCCTGGCATT         |
| Probe <sup>a</sup> | TGGTTGGTGGCTGTGTTTGCTTCTGT  |
| <b>GAPDH</b>       |                             |
| Forward            | GCACCACCAACTGCTTAGCAC       |
| Reverse            | TCTTCTGGGTGGCAGTGATG        |
| Probe <sup>a</sup> | TCGTGGAAGGACTCATGACCACAGTCC |

a. Probes were modified with 5'– (6-carboxyfluorescein) and 3'– (tetramethylrhodamine) as the fluorophore and quencher respectively.

**Supplementary Table 3. Top 50 genes expressed  $\geq 2.0$ -fold by classical monocytes in uninfected animals**

| Gene      | Gene name                                                       | Fold change classical versus |              |
|-----------|-----------------------------------------------------------------|------------------------------|--------------|
|           |                                                                 | Intermediate                 | Nonclassical |
| THBS1     | thrombospondin 1                                                | 2.6                          | 80.0         |
| TREM1     | triggering receptor expressed on myeloid cells 1                | 3.0                          | 63.1         |
| SERPINB10 | serpin peptidase inhibitor, clade B member 10                   | 2.6                          | 61.8         |
| CRISPLD2  | cysteine-rich secretory protein LCCL domain containing 2        | 2.2                          | 41.2         |
| S100A8    | S100 calcium binding protein A8                                 | 4.5                          | 40.5         |
| SLC7A11   | solute carrier family 7 member 11                               | 3.6                          | 40.5         |
| S100A9    | S100 calcium binding protein A9                                 | 4.7                          | 26.2         |
| SLC2A3    | solute carrier family 2 member 3                                | 2.2                          | 21.4         |
| GAFA1     | FGF2-associated protein GAFA1                                   | 2.3                          | 16.6         |
| IL8       | interleukin 8                                                   | 2.4                          | 14.5         |
| OSM       | oncostatin M precursor                                          | 2.4                          | 12.6         |
| QPCT      | glutaminyl-peptide cyclotransferase                             | 3.6                          | 10.5         |
| KCNAB1    | Potassium voltage-gated channel subunit beta 1                  | 2.7                          | 9.4          |
| AAK1      | AP2 Associated Kinase 1                                         | 3.5                          | 9.1          |
| BCL9L     | B-cell CLL/lymphoma 9-like                                      | 2.5                          | 8.4          |
| ACSL1     | acyl-CoA synthetase long-chain family member 1                  | 2.2                          | 7.0          |
| SELL      | selectin L                                                      | 4.2                          | 7.0          |
| RAB3D     | RAB3D, member Ras oncogene family                               | 2.7                          | 6.9          |
| NRG1      | neuregulin 1                                                    | 2.6                          | 6.6          |
| ELL3      | elongation factor RNA polymerase II-like 3                      | 3.4                          | 6.3          |
| NCAM1     | neural cell adhesion molecule 1                                 | 2.9                          | 5.9          |
| ZCCHC11   | zinc finger, CCHC domain containing 11                          | 2.8                          | 5.6          |
| FOSL2     | FOS-like antigen 2                                              | 3.5                          | 5.6          |
| C6orf192  | chromosome 6 open reading frame 192                             | 2.2                          | 5.6          |
| NP        | nucleoside phosphorylase                                        | 2.1                          | 5.5          |
| MGST1     | microsomal glutathione S-transferase 1                          | 3.6                          | 5.5          |
| CARS      | cysteinyl-tRNA synthetase                                       | 2.6                          | 5.4          |
| KIN       | KIN, antigenic determinant of recA protein homolog (mouse)      | 2.2                          | 5.3          |
| ATP13A3   | ATPase type 13A3                                                | 2.5                          | 5.1          |
| JUN       | jun oncogene                                                    | 2.3                          | 5.1          |
| DCUN1D3   | DCN1, defective in cullin neddylation 1, domain containing 3    | 3.6                          | 5.1          |
| PARD3     | Par-3 Partitioning Defective 3 Homolog (C. elegans)             | 3.9                          | 5.0          |
| NUP188    | nucleoporin 188kDa                                              | 3.3                          | 5.0          |
| SLC16A6   | solute carrier family 16, member 6                              | 2.7                          | 5.0          |
| TREML4    | triggering receptor expressed on myeloid cells-like 4           | 3.9                          | 4.9          |
| TTC19     | tetratricopeptide repeat domain 19                              | 2.6                          | 4.8          |
| ERCC8     | excision repair cross-complementing rodent repair deficiency, 8 | 3.5                          | 4.7          |
| RABEPK    | Rab9 effector p40                                               | 3.5                          | 4.7          |
| BAG2      | BCL2-associated athanogene 2                                    | 2.1                          | 4.7          |
| RAB23     | RAB23, member Ras oncogene family                               | 2.9                          | 4.5          |
| EEPD1     | endonuclease/exonuclease/phosphatase family domain containing 1 | 2.3                          | 4.5          |
| TGFBR1    | transforming growth factor, beta receptor 1                     | 2.5                          | 4.5          |
| TSPAN3    | tetraspanin 3                                                   | 2.3                          | 4.4          |
| EML1      | echinoderm microtubule associated protein like 1 isoform b      | 2.5                          | 4.4          |
| PRKCI     | protein kinase C, iota                                          | 2.3                          | 4.3          |
| CDC42EP3  | CDC42 effector protein (Rho GTPase binding) 3                   | 2.2                          | 4.2          |
| SVIL      | supervillin                                                     | 2.6                          | 4.2          |
| LILRBC    | leukocyte immunoglobulin-like receptor, subfamily B, member c   | 2.0                          | 4.2          |
| MALT1     | mucosa associated lymphoid tissue lymphoma translocation gene 1 | 2.1                          | 4.2          |
| GCA       | grancalcin, EF-hand calcium binding protein                     | 4.8                          | 4.2          |

**Supplementary Table 4. Genes expressed  $\geq 2.0$ -fold by intermediate monocytes in uninfected animals**

| Gene      | Gene name                                           | Fold change intermediate versus |              |
|-----------|-----------------------------------------------------|---------------------------------|--------------|
|           |                                                     | Classical                       | Nonclassical |
| CD1B      | CD1b molecule                                       | 2.2                             | 20.0         |
| GCNT1     | glucosaminyl (N-acetyl) transferase 1, core 2       | 2.1                             | 8.0          |
| CD1C      | CD1c molecule                                       | 2.2                             | 7.3          |
| LIPA      | lipase A precursor                                  | 2.1                             | 4.8          |
| VSIG4     | V-set and immunoglobulin domain containing 4        | 2.5                             | 4.2          |
| A2M       | alpha-2-macroglobulin                               | 2.8                             | 4.1          |
| ASPHD2    | aspartate beta-hydroxylase domain containing 2      | 3.1                             | 3.9          |
| MERTK     | c-mer proto-oncogene tyrosine kinase                | 2.7                             | 3.6          |
| ST3GAL5   | ST3 beta-galactoside alpha-2,3-sialyltransferase 5  | 2.4                             | 3.4          |
| MPZL2     | myelin protein zero-like 2                          | 2.5                             | 3.3          |
| CDC42BPA  | CDC42-binding protein kinase alpha isoform B        | 2.5                             | 3.0          |
| FABP5     | fatty acid binding protein 5 (psoriasis-associated) | 2.9                             | 2.9          |
| C3AR1     | complement component 3a receptor 1                  | 3.8                             | 2.8          |
| ABI3      | ABI family, member 3                                | 2.1                             | 2.6          |
| CLEC7A    | C-type lectin domain family 7, member A             | 2.1                             | 2.4          |
| RAB11FIP4 | RAB11 family interacting protein 4 (class II)       | 2.1                             | 2.4          |
| MGLL      | monoglyceride lipase                                | 2.8                             | 2.2          |

**Supplementary Table 5. Top 50 genes expressed  $\geq 2.0$ -fold by nonclassical monocytes in uninfected animals**

| Gene      | Gene Title                                                        | Fold change nonclassical versus |              |
|-----------|-------------------------------------------------------------------|---------------------------------|--------------|
|           |                                                                   | Classical                       | Intermediate |
| GNLY      | granulysin                                                        | 82.2                            | 27.0         |
| MS4A7     | membrane-spanning 4-domains, subfamily A, member 7                | 47.2                            | 5.5          |
| AHNAK2    | AHNAK nucleoprotein 2                                             | 36.2                            | 15.1         |
| FCGR3A    | Fc gamma receptor IIIa                                            | 35.6                            | 4.1          |
| GZMB      | granzyme B                                                        | 31.5                            | 13.3         |
| GZMH      | Granzyme H precursor                                              | 30.1                            | 14.8         |
| CDKN1C    | cyclin dependent kinase inhibitor 1C                              | 25.2                            | 10.8         |
| C1QA      | complement component 1, q subcomponent, A chain                   | 23.3                            | 3.4          |
| SEPP1     | selenoprotein P                                                   | 22.9                            | 2.5          |
| LPL       | lipoprotein lipase                                                | 19.4                            | 3.9          |
| DUSP5     | dual specificity phosphatase 5                                    | 18.0                            | 9.1          |
| MTSS1L    | metastasis suppressor 1-like                                      | 17.4                            | 7.6          |
| RAMP2     | receptor (G protein-coupled) activity modifying protein 2         | 16.4                            | 3.7          |
| MT1E      | metallothionein 1E                                                | 16.2                            | 7.4          |
| HTR7A     | 5-hydroxytryptamine receptor 7 isoform a                          | 16.1                            | 4.6          |
| CD300E    | CD300E molecule                                                   | 15.8                            | 2.7          |
| TCF7L2    | similar to Transcription factor 7-like 2                          | 14.9                            | 4.1          |
| ADA       | adenosine deaminase                                               | 14.0                            | 4.1          |
| GZMA      | granzyme A                                                        | 13.4                            | 10.3         |
| TOB1      | transducer of Erbb2 1                                             | 12.8                            | 5.2          |
| C11orf95  | chromosome 11 open reading frame 95                               | 12.3                            | 5.5          |
| PSMC2     | Similar to proteasome (prosome, macropain) 26S subunit, ATPase 2  | 12.2                            | 4.6          |
| NEU1      | Sialidase 1 (lysosomal sialidase)                                 | 11.5                            | 6.7          |
| PAG1      | phosphoprotein associated with glycosphingolipid microdomains 1   | 11.4                            | 5.8          |
| IFT81     | intraflagellarTransport81                                         | 11.2                            | 5.6          |
| ITGAX     | integrin, alpha X (complement component 3 receptor 4 subunit)     | 10.8                            | 3.0          |
| GPR155    | G protein-coupled receptor 155                                    | 10.4                            | 5.3          |
| C1QC      | complement component 1, q subcomponent, C chain                   | 9.8                             | 3.0          |
| ARHGAP32  | Rho GTPase-activating protein 32                                  | 9.8                             | 10.5         |
| HEG1      | HEG homolog 1 (zebrafish)                                         | 9.5                             | 5.1          |
| HIST1H2BH | similar to Histone H2B 291B                                       | 9.4                             | 9.3          |
| CASP2     | caspase 2, apoptosis-related cysteine peptidase                   | 9.0                             | 7.3          |
| CCL5      | chemokine (C-C motif) ligand 5                                    | 8.9                             | 7.8          |
| C18orf45  | chromosome 18 open reading frame 45                               | 8.8                             | 8.8          |
| NR4A1     | nuclear receptor subfamily 4, group A, member 1                   | 8.6                             | 5.8          |
| CSRP1     | Cysteine and Glycine-Rice Protein 1                               | 8.3                             | 3.8          |
| SCAMP5    | similar to secretory carrier membrane protein 5                   | 8.2                             | 4.4          |
| GUCY1A3   | Guanylate Cyclase 1, Soluble, Alpha 3                             | 8.2                             | 5.3          |
| CYFIP2    | similar to cytoplasmic FMR1 interacting protein 2                 | 8.2                             | 5.6          |
| SASH1     | SAM and SH3 domain containing 1                                   | 8.1                             | 2.5          |
| NKG7      | natural killer cell group 7 sequence                              | 8.0                             | 4.8          |
| NKG2D     | NKG2D protein                                                     | 8.0                             | 5.7          |
| C1QB      | similar to Complement C1q subcomponent subunit B precursor        | 8.0                             | 2.3          |
| FMNL2     | formin-like 2                                                     | 7.9                             | 4.7          |
| CARM1     | coactivator-associated arginine methyltransferase 1               | 7.8                             | 3.8          |
| TNF       | tumor necrosis factor                                             | 7.5                             | 4.7          |
| ITGAD     | similar to integrin, alpha D precursor                            | 7.4                             | 3.1          |
| CAMK2G    | calcium/calmodulin-dependent protein kinase II gamma              | 7.4                             | 7.8          |
| ITGAL     | integrin, alpha L (antigen CD11A (p180), LFA1; alpha polypeptide) | 7.3                             | 2.4          |

**Supplementary Table 6. Top 50 genes expressed  $\geq 2.0$ -fold by classical and intermediate monocytes in uninfected animals**

| Gene     | Gene Title                                                         | Fold change versus nonclassical |              |
|----------|--------------------------------------------------------------------|---------------------------------|--------------|
|          |                                                                    | Classical                       | Intermediate |
| VCAN     | versican                                                           | 148.2                           | 86.7         |
| SERPINB2 | serpin peptidase inhibitor, clade B (ovalbumin), member 2          | 109.3                           | 60.3         |
| FN1      | fibronectin 1                                                      | 65.9                            | 46.9         |
| CYP1B1   | cytochrome P450, family 1, subfamily B, polypeptide 1              | 65.7                            | 77.0         |
| ALOX5AP  | arachidonate 5-lipoxygenase-activating protein                     | 65.0                            | 25.1         |
| PTGS2    | prostaglandin H synth 2                                            | 48.4                            | 35.6         |
| SDC2     | budding uninhibited by benzimidazoles 3 homolog                    | 47.4                            | 46.1         |
| VEGFA    | vascular endothelial growth factor A                               | 46.5                            | 22.8         |
| BASP1    | brain abundant, membrane attached signal protein 1                 | 42.4                            | 34.3         |
| RIN2     | Ras and Rab interactor 2                                           | 37.9                            | 50.7         |
| IL13RA1  | Interleukin-13 receptor alpha-1 chain                              | 30.5                            | 25.9         |
| ADAM19   | ADAM metallopeptidase domain 19                                    | 29.1                            | 19.1         |
| DEPDC1   | DEP domain containing 1                                            | 26.1                            | 15.9         |
| MS4A6A   | membrane-spanning 4-domains, subfamily A, member 6A                | 24.9                            | 50.0         |
| FCAR     | Fc fragment of IgA, receptor for                                   | 24.7                            | 12.6         |
| PID1     | phosphotyrosine interaction domain containing 1                    | 24.5                            | 18.4         |
| DCP2     | DCP2 decapping enzyme                                              | 23.9                            | 24.4         |
| KIR3DL   | killer immunoglobulin-like receptor KIR3DL                         | 22.4                            | 19.2         |
| ADO      | 2-aminoethanethiol (cysteamine) dioxygenase                        | 20.2                            | 10.2         |
| CCR1     | chemokine (C-C motif) receptor 1                                   | 20.1                            | 16.1         |
| ACVR2A   | activin A receptor, type IIA                                       | 18.8                            | 22.6         |
| SSH2     | slingshot 2                                                        | 18.2                            | 30.4         |
| SLC38A2  | solute carrier family 38, member 2                                 | 17.9                            | 11.1         |
| F3       | coagulation factor III (thromboplastin, tissue factor)             | 17.9                            | 11.7         |
| FCGR2B   | Fc fragment of IgG, low affinity IIb, receptor (CD32)              | 17.8                            | 19.9         |
| RUNX1    | runt-related transcription factor 1                                | 17.5                            | 13.0         |
| GSN      | gelsolin                                                           | 17.1                            | 15.7         |
| PRDM1    | PR domain containing 1, with ZNF domain                            | 16.1                            | 19.4         |
| RUNX2    | runt-related transcription factor 2                                | 15.6                            | 13.4         |
| ADORA2B  | adenosine A2b receptor                                             | 15.4                            | 8.0          |
| NEK6     | NIMA (never in mitosis gene a)-related kinase 6                    | 13.2                            | 7.1          |
| GAS7     | growth-arrest-specific protein 7                                   | 13.1                            | 10.8         |
| RB1      | retinoblastoma 1                                                   | 12.3                            | 13.4         |
| CD163    | CD163 molecule                                                     | 12.3                            | 10.9         |
| THBD     | thrombomodulin                                                     | 12.2                            | 8.3          |
| ADRB1    | adrenergic, beta-1-, receptor                                      | 12.0                            | 11.4         |
| NUFIP1   | nuclear fragile X mental retardation protein interacting protein 1 | 11.7                            | 7.9          |
| EGR2     | early growth response 2                                            | 11.0                            | 9.2          |
| SERPINB6 | serpin peptidase inhibitor, clade B (ovalbumin), member 6          | 10.7                            | 6.5          |
| LGALS1   | lectin, galactoside-binding, soluble, 1                            | 10.7                            | 11.4         |
| KIR3DL17 | killer-cell Ig-like receptor KIR3DL17                              | 10.5                            | 9.0          |
| MSR1     | macrophage scavenger receptor 1                                    | 10.4                            | 14.1         |
| P2RY2    | purinergic receptor P2Y, G-protein coupled, 2                      | 10.2                            | 11.9         |
| CSDA     | cold shock domain protein A                                        | 9.9                             | 8.9          |
| SLC2A5   | solute carrier family 2 member 5                                   | 9.8                             | 8.1          |
| PLP2     | proteolipid protein 2                                              | 9.5                             | 5.3          |
| TLR4     | toll-like receptor 4                                               | 9.4                             | 10.1         |
| HNRPLL   | heterogeneous nuclear ribonucleoprotein L-like                     | 9.3                             | 5.3          |
| SEMA4C   | Semaphorin 4C                                                      | 9.2                             | 12.0         |
| GPR183   | G protein-coupled receptor 183                                     | 9.0                             | 12.6         |

**Supplementary Table 7. Genes expressed  $\geq 2.0$ -fold by intermediate and nonclassical monocytes in uninfected animals**

| Gene    | Gene Title                                                           | Fold change versus classical |              |
|---------|----------------------------------------------------------------------|------------------------------|--------------|
|         |                                                                      | Intermediate                 | Nonclassical |
| FCGR3B  | Fc fragment of IgG, low affinity IIIb, receptor                      | 22.6                         | 46.5         |
| PLVAP   | plasmalemma vesicle associated protein                               | 7.7                          | 14.2         |
| RNF144B | ring finger protein 144B                                             | 4.4                          | 9.8          |
| CCND2   | cyclin D2                                                            | 6.5                          | 9.3          |
| PAQR4   | progesterin and adipoQ receptor family member IV                     | 4.6                          | 8.1          |
| PIK3R3  | phosphoinositide-3-kinase, regulatory subunit 3 (gamma)              | 3.0                          | 6.7          |
| LILRA1  | leukocyte immunoglobulin-like receptor, subfamily A member 1         | 4.1                          | 6.6          |
| SUSD3   | sushi domain containing 3                                            | 3.1                          | 5.5          |
| ARPC1A  | actin related protein 2/3 complex subunit 1A                         | 2.7                          | 5.0          |
| LY6E    | lymphocyte antigen 6 complex, locus E                                | 2.5                          | 4.8          |
| SPN     | sialophorin (CD43)                                                   | 2.8                          | 4.8          |
| PRR5L   | Rho GTPase activating protein 8                                      | 2.9                          | 4.7          |
| UCP2    | uncoupling protein 2                                                 | 3.4                          | 4.4          |
| SQLE    | squalene epoxidase                                                   | 3.0                          | 4.4          |
| VMO1    | Vitelline membrane outer layer protein 1 homolog                     | 3.3                          | 4.4          |
| PALLD   | palladin, cytoskeletal associated protein                            | 2.2                          | 4.1          |
| LRRC25  | leucine rich repeat containing 25                                    | 2.3                          | 3.8          |
| HSPD1   | 60 kDa heat shock protein, mitochondrial precursor                   | 3.5                          | 3.8          |
| LILRB1  | leukocyte immunoglobulin-like receptor, subfamily B, member 1 (CD85) | 2.0                          | 3.6          |
| CD83    | CD83 molecule                                                        | 2.4                          | 3.3          |
| ALDH2   | aldehyde dehydrogenase, mitochondrial-like                           | 2.4                          | 3.3          |
| ASCC3   | activating signal cointegrator 1 complex subunit 3                   | 2.1                          | 3.2          |
| PLA1A   | phospholipase A1 member A                                            | 4.1                          | 3.1          |
| DNM1    | dynammin-1-like                                                      | 2.4                          | 3.0          |
| BPTF    | nucleosome-remodeling factor subunit BPTF-like                       | 2.8                          | 2.9          |
| CTSC    | cathepsin C                                                          | 3.4                          | 2.7          |
| CD4     | CD4 molecule                                                         | 2.8                          | 2.6          |
| CTPS    | CTP synthase                                                         | 2.7                          | 2.6          |
| NAGA    | N-acetylgalactosaminidase, alpha                                     | 2.2                          | 2.1          |
